# Supplementary material for: Quantitative Proteomics Study of Larval Settlement in the Barnacle Balanus amphitrite
Source: PLoS One. 2014 Feb 13;9(2):e88744. doi: 10.1371/journal.pone.0088744 (PMC3923807; doi:10.1371/journal.pone.0088744)
Supplement: Table S5 — Significantly down-regulated proteins in stage II nauplii. (XLSX) [file pone.0088744.s005.xlsx]

## Sheet: Sheet1
Table S5. Significantly down-regulated proteins in stage II nauplii.
		protein abundance (×1000 molecules/cell)								protein ratios
		nau2		nau6		cyp		juv		nau6/nau2			cyp/nau2			juv/nau2
Accession No.	Protein Description	ave	SD	ave	SD	ave	SD	ave	SD	ave	SD	p	ave	SD	p	ave	SD	p
CL68.Contig2_Ba_mix	settlement inducing protein complex	1.39691	0.635679	41.6364	1.52663	55.0131	2.08593	39.8698	3.05084	29.8061	1.09286	0.000151112	39.3821	1.49325	4.12823e-06	28.5415	2.18399	1.71447e-05
CL565.Contig1_Ba_mix	vitellogenin 2	9.57137	2.93058	148.606	4.52024	144.701	8.05389	92.3966	3.04633	15.5261	0.472267	0.000144837	15.1181	0.841456	1.19567e-05	9.65344	0.318275	2.2931e-05
CL992.Contig1_Ba_mix	beta-N-acetylglucosaminidase	N.D.	N.D.	18.1204	0.577851	21.7693	0.358667	25.0147	1.41491	N.A.	N.A.	0.00717828	N.A.	N.A.	2.26628e-05	N.A.	N.A.	0.000263349
CL4553.Contig1_Ba_mix	S-adenosylhomocysteine hydrolase	24.3193	2.37892	84.0003	0.88101	89.5982	6.73146	48.9625	3.79563	3.45406	0.0362268	0.000179573	3.68425	0.276795	5.44739e-05	2.01332	0.156075	0.000621703
CL3281.Contig1_Ba_mix	heat shock 70kDa protein 5	13.5238	2.46769	36.1277	1.18671	24.6833	2.33635	51.2748	7.69675	2.67142	0.0877496	0.00272159	1.82517	0.172759	0.00541372	3.79145	0.569127	0.000663403
CL226.Contig1_Ba_mix	AGAP007827-PA isoform 1	42.7666	2.3564	120.281	4.25696	99.7223	3.77118	77.3421	6.36233	2.81251	0.0995393	0.000120814	2.33178	0.0881804	2.15862e-05	1.80847	0.148768	0.000663998
CL1.Contig245_Ba_mix	arginine kinase	29.1132	3.81069	51.1439	3.62371	58.2287	1.94692	60.3322	4.20907	1.75672	0.12447	0.00917399	2.00007	0.0668741	0.000472794	2.07233	0.144576	0.000734039
CL3275.Contig1_Ba_mix	uncharacterized WD repeat-containing protein YPL183C	4.62043	1.23329	18.1582	3.77079	23.5524	1.76752	28.6906	7.94583	3.92999	0.816113	0.00684876	5.09746	0.382545	0.000158955	6.20951	1.71972	0.00204509
Unigene10358_Ba_mix	Basement membrane-specific heparan sulfate proteoglycan core protein	6.06496	0.758941	21.9168	2.56447	15.2245	0.94878	14.3688	2.42778	3.61368	0.422834	0.00125662	2.51024	0.156436	0.000225276	2.36916	0.400297	0.00319821
CL791.Contig1_Ba_mix	Vacuolar ATP synthase catalytic subunit A	24.299	2.81782	49.0525	2.44753	42.5485	6.6507	42.8179	4.9403	2.01871	0.100726	0.00283803	1.75104	0.273703	0.00987647	1.76213	0.203313	0.00424039
CL4518.Contig1_Ba_mix	fumarylacetoacetate hydrolase (fumarylacetoacetase)	19.1312	2.3467	49.0305	0.402836	61.1681	4.74403	34.5248	4.41745	2.56286	0.0210565	0.000959088	3.19729	0.247974	0.000124804	1.80463	0.230903	0.00493429
Unigene7974_Ba_mix	AGAP003656-PA	5.28376	1.95282	28.2153	0.873426	13.2244	1.78469	20.9488	5.50393	5.34	0.165304	0.00290155	2.50284	0.337768	0.0101524	3.96476	1.04167	0.00609304
CL6159.Contig1_Ba_mix	d-2-hydroxyglutarate dehydrogenase, mitochondrial	7.95496	1.76865	20.0046	1.10122	26.5091	0.590912	22.5702	5.04979	2.51473	0.138432	0.00599027	3.33239	0.0742822	0.000202705	2.83724	0.634797	0.00623933
CL8494.Contig1_Ba_mix	GST-N-Metaxin-like protein	0.530482	0.918822	24.2525	0.754455	5.44438	2.04916	9.67933	3.64702	45.718	1.42221	0.00369844	10.2631	3.86283	0.0198087	18.2463	6.87492	0.00757315
Unigene16516_Ba_mix	serine-pyruvate aminotransferase, mitochondrial	5.80694	5.63911	74.5668	14.865	75.6989	4.52729	47.9204	10.8714	12.841	2.55986	0.0167356	13.0359	0.779634	0.0195638	8.25226	1.87214	0.0109189
CL2156.Contig2_Ba_mix	polyubiquitin	22.3286	1.23893	38.5061	1.99727	50.1568	4.40718	33.9546	5.70341	1.72452	0.0894491	0.00143028	2.2463	0.197379	0.000279206	1.52068	0.255431	0.0191809
CL1275.Contig1_Ba_mix	dihydropyrimidinase	6.95758	1.40054	16.0863	3.22058	23.5052	2.75912	12.6799	2.50263	2.31205	0.462888	0.0183578	3.37836	0.396563	0.000597117	1.82247	0.359699	0.0219774
CL385.Contig3_Ba_mix	transmembrane protein 2	2.13488	0.864742	37.168	3.07455	40.1653	3.9809	6.86344	2.44496	17.4099	1.44015	0.000361461	18.8139	1.8647	3.84888e-05	3.21491	1.14525	0.0241493
Unigene11461_Ba_mix	angiotensin converting enzyme	0.996208	0.975773	26.2414	1.03366	20.2981	2.58964	7.56282	3.0735	26.3413	1.0376	0.00410805	20.3754	2.5995	0.00119568	7.59161	3.0852	0.0248099
nau2, the stage II nauplii; nau6, the stage VI nauplii; cyp, the cyprids; juv, the juveniles; Ave, average; SD, standard deviation; N.A., not available; N.D., not detected; p value was obtained by Student t-test.
